# Supplementary material for: Clinical and Survival Impact of Sex-Determining Region Y-Box 2 in Colorectal Cancer: An Integrated Analysis of the Immunohistochemical Study and Bioinformatics Analysis
Source: J Oncol. 2020 Feb 13;2020:3761535. doi: 10.1155/2020/3761535 (PMC7040407; doi:10.1155/2020/3761535)
Supplement: Supplementary Materials — Table S1: data of the eligible publications with the clinicopathological characteristics. Figure S1: publication bias using Egger's test. PRISMA 2009 Checklist Search terms Code for example. [file 3761535.f1.zip]

Archive with 8 entries (7 files):
- Supplementary Materials/Code for example/
- Supplementary Materials/Code for example/Cancer_specific_survival.txt
- Supplementary Materials/Code for example/code.R
- Supplementary Materials/Code for example/Gender.txt
- Supplementary Materials/Figure S1.tiff
- Supplementary Materials/PRISMA 2009 Checklist.doc
- Supplementary Materials/Search terms.docx
- Supplementary Materials/Table S1.docx
