# Supplementary material for: Clinical and Survival Impact of Sex-Determining Region Y-Box 2 in Colorectal Cancer: An Integrated Analysis of the Immunohistochemical Study and Bioinformatics Analysis
Source: J Oncol. 2020 Feb 13;2020:3761535. doi: 10.1155/2020/3761535 (PMC7040407; doi:10.1155/2020/3761535)
Supplement: Supplementary Materials — Table S1: data of the eligible publications with the clinicopathological characteristics. Figure S1: publication bias using Egger's test. PRISMA 2009 Checklist Search terms Code for example. [file 3761535.f1.zip › Supplementary Materials/Code for example/Cancer_specific_survival.txt]

study	hr	lci	uci
Ong 2010	1.03	0.72	1.48
Lundberg 2014	1.04	0.65	1.67
Miller 2017	6.19	2.24	17.10
